# Supplementary material
Source: PubMed Central journal article supplement (PMC7118620)
Supplement: jamaophthalmol-138-560-s002.pdf [file jamaophthalmol-138-560-s002.pdf]

## Supplementary Online Content

Hsu J, Patel SN, Wolfe J, et al. Effect of adjuvant topical dorzolamide-timolol vs placebo in neovascular age-related macular degeneration: a randomized clinical trial. *JAMA Ophthalmol*. Published online April 2, 2020. doi:10.1001/jamaophthalmol.2020.0724

**eFigure 1.** Distribution of changes in central subfoveal fluid height from the baseline visit

**eFigure 2.** Mean visual acuity at the baseline visit and subsequent three visits

**eFigure 3.** Mean change in visual acuity from the baseline visit

**eTable.** Adverse events summary

This supplementary material has been provided by the authors to give readers additional information about their work.

**eFigure 1. Distribution of changes in central subfoveal fluid height from the baseline visit.** *P* values were obtained using analysis of covariance, with adjustment for baseline central subfoveal fluid height and type of anti-vascular endothelial growth factor used. Error bars represent standard deviation. Topical dorzolamide-timolol (black) versus placebo (gray).

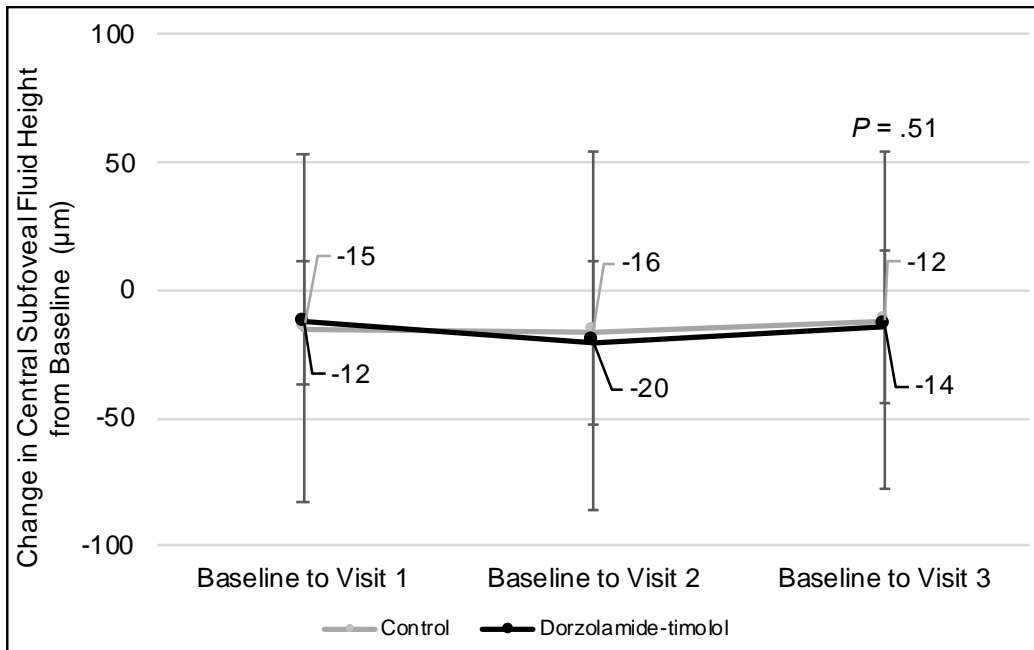

**eFigure 2. Mean visual acuity at the baseline visit and subsequent three visits.** Error bars represent standard deviation. Topical dorzolamide-timolol (black) versus placebo (gray).

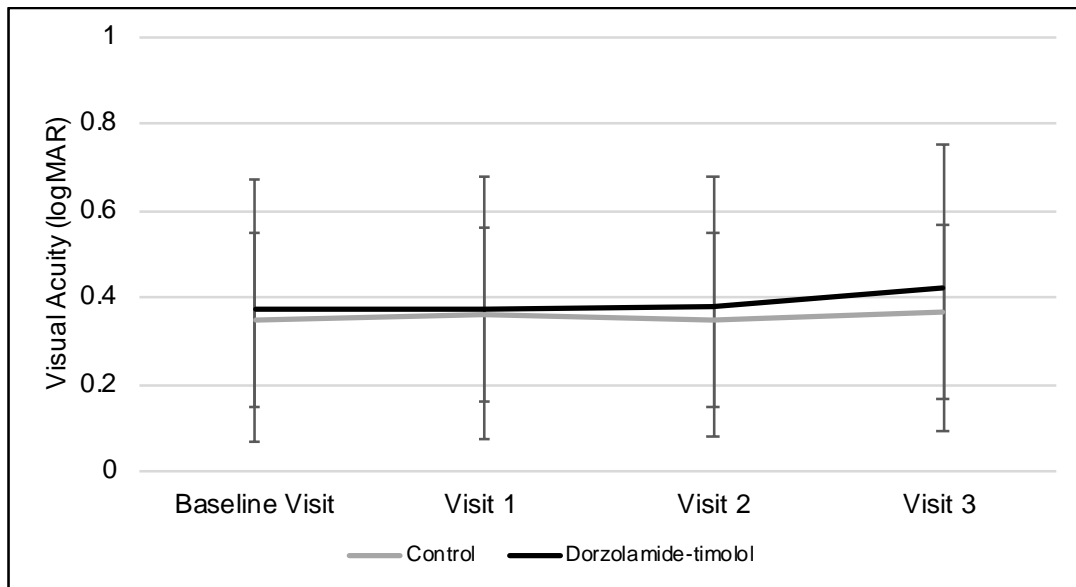

**eFigure 3. Mean change in visual acuity from the baseline visit.** *P* values were obtained using analysis of covariance. Error bars represent standard deviation. Topical dorzolamide-timolol (black) versus placebo (gray).

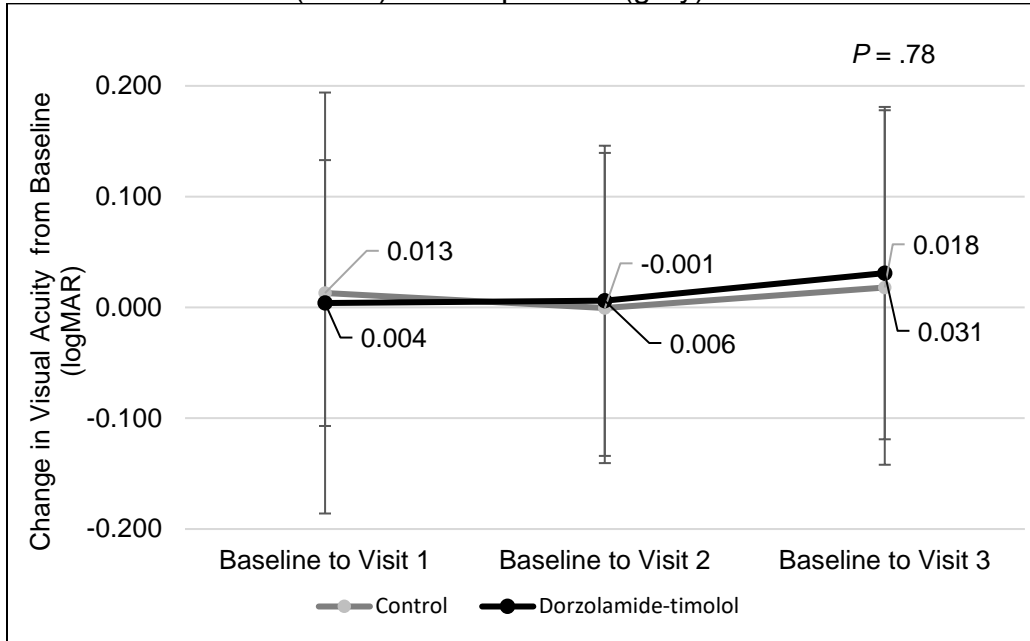

**eTable 1. Adverse events summary**

|                                                                               | <b>Dorzolamide-<br/>Timolol, No. (%)<br/>Total N = 27</b> | <b>Placebo, No. (%)<br/>Total N = 25</b> |
|-------------------------------------------------------------------------------|-----------------------------------------------------------|------------------------------------------|
| <b>Related to treatment</b>                                                   |                                                           |                                          |
| Eyelid swelling                                                               |                                                           | 1 (4)                                    |
| <b>Not related to treatment,<br/>but occurred during the<br/>study period</b> |                                                           |                                          |
| Rectal bleeding                                                               | 1 (4)                                                     |                                          |
| Leg weakness                                                                  |                                                           | 1 (4)                                    |
