# Supplementary material
Source: PubMed Central journal article supplement (PMC7118620)
Supplement: jamaophthalmol-138-560-s003.pdf [file jamaophthalmol-138-560-s003.pdf]

## Data Sharing Statement

Hsu. Effect of Adjuvant Topical Dorzolamide-Timolol vs Placebo in Neovascular Age-Related Macular Degeneration. *JAMA Ophthalmol*. Published April 02, 2020. 10.1001/jamaophthalmol.2020.0724

### Data

**Data available:** No
